# Supplementary material
Source: PubMed Central journal article supplement (PMC5772966)
Supplement: NIHMS933406-supplement-supplement_1.pdf [file NIHMS933406-supplement-supplement_1.pdf]

1  
2  
3 **Title:** Cross-sectional and Longitudinal Associations of Neighborhood Social  
4 Environment and Smoking Behavior: the Multi-Ethnic Study of Atherosclerosis  
5  
6  
7

8 **Authors:** Stephanie L. Mayne, Amy H. Auchincloss, Kari A. Moore, Yvonne L. Michael,  
9 Loni Philip Tabb, Sandra E. Echeverria, Ana V. Diez Roux  
10  
11  
12  
13  
14  
15  
16  
17

## 18 SUPPLEMENT

19  
20  
21  
22  
23

24 **Supplemental Table 1.** Comparison of Included Sample to All MESA Neighborhood  
25 Study Participants  
26  
27

28  
29 **Supplemental Table 2.** Bivariate Associations of Socio-demographic Characteristics  
30 with Smoking Status  
31  
32  
33

34 **Supplemental Table 3.** Bivariate Associations of Socio-demographic Characteristics  
35 with Baseline Neighborhood Social Environment  
36  
37  
38

39 **Supplemental Table 4.** Sensitivity Analysis: Cross-sectional and Longitudinal  
40 Associations of Baseline Neighborhood Social Environment with Smoking Status and  
41 Intensity Among Participants with at least 5 1-mile neighbors (N=5,558)  
42  
43  
44  
45

46 **Supplemental Table 5.** Sensitivity Analysis: Cross-sectional and Longitudinal  
47 Associations of Baseline Neighborhood Social Environment with Smoking Status and  
48 Intensity Among Participants with at least 3 Exam-Years of Data (N=5,526)  
49  
50  
51  
52  
53  
54  
55  
56  
57  
58  
59  
60

**Supplemental Table 1.** Comparison of Baseline Socio-demographic, Neighborhood, and Health Behavior Characteristics between Included Sample and Excluded MESA Neighborhood Study Participants (2000-2002). N=6,191

| Sample Characteristics                                                                       | Included<br>N=5,856 | Excluded<br>N=335 | p-value |
|----------------------------------------------------------------------------------------------|---------------------|-------------------|---------|
| <b>Demographic Characteristics</b>                                                           |                     |                   |         |
| Mean age (SD)                                                                                | 61.9 (10.1)         | 62.2 (10.2)       | 0.6     |
| Gender (%)                                                                                   |                     |                   | 0.0002  |
| Male                                                                                         | 2753 (47.0)         | 192 (57.3)        |         |
| Female                                                                                       | 3103 (53.0)         | 143 (42.7)        |         |
| Race (%)                                                                                     |                     |                   | 0.5     |
| White                                                                                        | 2291 (39.1)         | 142 (42.4)        |         |
| Chinese                                                                                      | 694 (11.9)          | 35 (10.4)         |         |
| Black/African American                                                                       | 1610 (27.5)         | 83 (24.8)         |         |
| Hispanic                                                                                     | 1261 (21.5)         | 75 (22.4)         |         |
| Education (%)                                                                                |                     |                   | 0.8     |
| High school graduate or less                                                                 | 2051 (35.0)         | 106 (33.4)        |         |
| Some college                                                                                 | 1660 (28.4)         | 95 (30.0)         |         |
| Bachelor's or Graduate degree                                                                | 2145 (36.6)         | 116 (36.6)        |         |
| Employment Status (%)                                                                        |                     |                   | 0.6     |
| Currently working                                                                            | 3190 (54.5)         | 172 (53.1)        |         |
| Not currently working                                                                        | 2666 (45.5)         | 152 (46.9)        |         |
| Mean per capita annual household income adjusted for inflation, in increments of 10,000 (SD) | 2.6 (2.0)           | 2.8 (2.3)         | 0.1     |
| Marital status (%)                                                                           |                     |                   | 0.7     |
| Currently married                                                                            | 3610 (61.6)         | 202 (60.7)        |         |
| Not currently married                                                                        | 2246 (38.4)         | 131 (39.3)        |         |
| Current Alcohol Use (%)                                                                      |                     |                   | 0.07    |
| Yes                                                                                          | 3287 (56.1)         | 205 (61.2)        |         |
| No                                                                                           | 2569 (43.9)         | 130 (38.8)        |         |
| Smoking Status                                                                               |                     |                   | 0.8     |
| Current                                                                                      | 741 (12.7)          | 42 (13.2)         |         |
| Former                                                                                       | 2158 (36.8)         | 121 (38.1)        |         |
| Never                                                                                        | 2957 (50.5)         | 155 (48.7)        |         |
| Mean # cigs in current smokers only                                                          | 13.5 (17.7)         | 11.3 (11.4)       | 0.2     |
| <b>Neighborhood Characteristics</b>                                                          |                     |                   |         |
| Mean neighborhood SES score (SD)                                                             | -0.01 (6.33)        | 1.03 (5.77)       | 0.002   |
| Mean neighborhood social environment score (SD)                                              | -0.15 (2.52)        | -0.01 (2.35)      | 0.4     |
| Mean aesthetic quality score (SD)                                                            | 3.67 (0.43)         | 3.74 (0.38)       | 0.006   |
| Mean safety score (SD)                                                                       | 3.65 (0.42)         | 3.70 (0.45)       | 0.2     |
| Mean social cohesion score (SD)                                                              | 3.54 (0.26)         | 3.55 (0.27)       | 0.4     |

<sup>1</sup>Participants were excluded due to inaccurate geocoding of addresses or missing data on smoking outcomes, neighborhood social environment, or covariates.

**Supplemental Table 2.** Bivariate Associations of Socio-demographic Characteristics with Smoking Status (N=5,856)

| Sample Characteristics at Baseline                                                           | Baseline Smokers | Baseline Non-Smokers | p-value <sup>1</sup> |
|----------------------------------------------------------------------------------------------|------------------|----------------------|----------------------|
| N                                                                                            | 741              | 5,115                |                      |
| <b>Demographic Characteristics</b>                                                           |                  |                      |                      |
| Mean age (SD)                                                                                | 57.9 (9.1)       | 62.5 (10.2)          | <0.0001              |
| Gender (%)                                                                                   |                  |                      | 0.0006               |
| Male                                                                                         | 392 (52.9)       | 2,361 (46.2)         |                      |
| Female                                                                                       | 349 (47.1)       | 2,754 (53.8)         |                      |
| Race (%)                                                                                     |                  |                      | <0.0001              |
| White                                                                                        | 251 (33.9)       | 2,040 (39.9)         |                      |
| Chinese                                                                                      | 38 (5.1)         | 656 (12.8)           |                      |
| Black/African American                                                                       | 286 (38.6)       | 1,324 (25.9)         |                      |
| Hispanic                                                                                     | 166 (22.4)       | 155 (22.4)           |                      |
| Education (%)                                                                                |                  |                      | <0.0001              |
| High school graduate or less                                                                 | 287 (38.7)       | 1,764 (34.5)         |                      |
| Some college                                                                                 | 273 (36.8)       | 1,387 (27.1)         |                      |
| Bachelor's or Graduate degree                                                                | 181 (24.4)       | 1,964 (38.4)         |                      |
| Employment Status (%)                                                                        |                  |                      | 0.001                |
| Currently working                                                                            | 445 (60.1)       | 2,745 (53.7)         |                      |
| Not currently working                                                                        | 296 (39.9)       | 2,370 (46.3)         |                      |
| Mean per capita annual household income adjusted for inflation, in increments of 10,000 (SD) | 2.5 (2.1)        | 2.6 (2.0)            | 0.2                  |
| Marital status (%)                                                                           |                  |                      | <0.0001              |
| Currently married                                                                            | 383 (51.7)       | 3,227 (63.1)         |                      |
| Not currently married                                                                        | 358 (48.3)       | 1,888 (36.9)         |                      |
| <b>Health Behaviors</b>                                                                      |                  |                      |                      |
| Current Alcohol Use (%)                                                                      |                  |                      | <0.0001              |
| Yes                                                                                          | 506 (68.3)       | 2,781 (54.4)         |                      |
| No                                                                                           | 235 (31.7)       | 2,334 (45.6)         |                      |
| Mean number of cigarettes smoked per day (SD)                                                | 13.5 (17.7)      | 0 (0.0)              | <0.0001              |
| <b>Neighborhood Characteristics</b>                                                          |                  |                      |                      |
| Mean neighborhood socioeconomic score (SD)                                                   | -1.51 (5.94)     | 0.21 (6.35)          | <0.0001              |
| Mean neighborhood social environment score (SD) <sup>b</sup>                                 | -0.63 (2.50)     | -0.08 (2.52)         | <0.0001              |
| Mean aesthetic quality score (SD)                                                            | -0.22 (0.96)     | -0.05 (0.96)         | <0.0001              |
| Mean safety score (SD)                                                                       | -0.24 (0.89)     | 0.01 (0.92)          | <0.0001              |
| Mean social cohesion score (SD)                                                              | -0.17 (0.91)     | -0.04 (0.91)         | 0.0005               |
| <b>Unstandardized Component Scores</b>                                                       |                  |                      |                      |
| Mean aesthetic quality score (SD)                                                            | 3.60 (0.4)       | 3.68 (0.43)          | <0.0001              |
| Mean safety score (SD)                                                                       | 3.56 (0.4)       | 3.67 (0.42)          | <0.0001              |
| Mean social cohesion score (SD)                                                              | 3.51 (0.3)       | 3.54 (0.26)          | 0.0005               |

<sup>1</sup>p-values calculated using chi-squared test for categorical variables and t-tests and Mann Whitney U tests for continuous variables

**Supplemental Table 3.** Bivariate Associations of Socio-demographic Characteristics with Baseline Neighborhood Social Environment (N=5,856)

| Sample Characteristics at Baseline                                                           | Baseline Neighborhood Social Environment Score |             |                     | p-value <sup>1</sup> |
|----------------------------------------------------------------------------------------------|------------------------------------------------|-------------|---------------------|----------------------|
|                                                                                              | Tertile 1<br>(worst)                           | Tertile 2   | Tertile 3<br>(best) |                      |
| N                                                                                            | 1932 (33.0)                                    | 1991 (34.0) | 1933 (33.0)         |                      |
| <b>Demographic Characteristics</b>                                                           |                                                |             |                     |                      |
| Mean age (SD)                                                                                | 61.5 (10.2)                                    | 62.3 (10.3) | 61.9 (9.8)          | 0.07                 |
| Gender (%)                                                                                   |                                                |             |                     | 0.04                 |
| Male                                                                                         | 874 (45.2)                                     | 928 (46.6)  | 951 (49.2)          |                      |
| Female                                                                                       | 1058 (54.8)                                    | 1063 (53.4) | 982 (50.8)          |                      |
| Race (%)                                                                                     |                                                |             |                     | <0.0001              |
| White                                                                                        | 350 (18.1)                                     | 820 (41.2)  | 1121 (58.0)         |                      |
| Chinese                                                                                      | 155 (8.0)                                      | 363 (18.2)  | 176 (9.1)           |                      |
| Black/African American                                                                       | 747 (38.7)                                     | 394 (19.8)  | 469 (24.3)          |                      |
| Hispanic                                                                                     | 680 (35.2)                                     | 414 (20.8)  | 167 (8.6)           |                      |
| Education (%)                                                                                |                                                |             |                     | <0.0001              |
| High school graduate or less                                                                 | 963 (49.9)                                     | 673 (33.8)  | 415 (21.5)          |                      |
| Some college                                                                                 | 528 (27.3)                                     | 547 (27.5)  | 585 (30.2)          |                      |
| Bachelor's or Graduate degree                                                                | 441 (22.8)                                     | 771 (38.7)  | 933 (48.3)          |                      |
| Employment Status (%)                                                                        |                                                |             |                     | <0.0001              |
| Currently working                                                                            | 995 (51.5)                                     | 1060 (53.2) | 1135 (58.7)         |                      |
| Not currently working                                                                        | 937 (48.5)                                     | 931 (46.8)  | 798 (41.3)          |                      |
| Mean per capita annual household income adjusted for inflation, in increments of 10,000 (SD) | 2.0 (1.6)                                      | 2.5 (2.0)   | 3.4 (2.2)           | <0.0001              |
| Marital status (%)                                                                           |                                                |             |                     | <0.0001              |
| Currently married                                                                            | 1006 (52.1)                                    | 1234 (62.0) | 1370 (70.9)         |                      |
| Not currently married                                                                        | 926 (47.9)                                     | 757 (38.0)  | 563 (29.1)          |                      |
| <b>Health Behaviors</b>                                                                      |                                                |             |                     |                      |
| Current Alcohol Use (%)                                                                      |                                                |             |                     | <0.0001              |
| Yes                                                                                          | 956 (49.5)                                     | 1132 (56.9) | 1199 (62.0)         |                      |
| No                                                                                           | 976 (50.5)                                     | 859 (43.1)  | 734 (38.0)          |                      |
| Current Smoking (%)                                                                          |                                                |             |                     | <0.0001              |
| Yes                                                                                          | 315 (16.3)                                     | 228 (11.5)  | 198 (10.2)          |                      |
| No                                                                                           | 1617 (83.7)                                    | 1763 (88.5) | 1735 (89.8)         |                      |
| Mean number of cigarettes smoked per day (SD)- current only                                  | 11.6 (9.7)                                     | 13.4 (10.2) | 16.6 (29.9)         | <0.0001              |
| <b>Neighborhood Characteristics</b>                                                          |                                                |             |                     |                      |
| Mean neighborhood socioeconomic score (SD)                                                   | -5.39 (5.30)                                   | 0.80 (4.76) | 4.52 (4.43)         | <0.0001              |

<sup>1</sup>P-values from chi-squared tests for categorical and ANOVA/Kruskal Wallis for continuous variables

**Supplemental Table 4.** Sensitivity Analysis- Cross-sectional and Longitudinal Associations of Baseline Neighborhood Social Environment with Smoking Status and Intensity Among Participants with at least 5 1-mile neighbors (N=5,558)

**A. Relative Risk (95% CI) for Current Smoking N=5,558**

|                                 | Model 1              |                              |                                         | Model 2              |                              |                                         | Model 3              |                              |                                         |
|---------------------------------|----------------------|------------------------------|-----------------------------------------|----------------------|------------------------------|-----------------------------------------|----------------------|------------------------------|-----------------------------------------|
|                                 | Baseline Score       | Time Trend (5 year interval) | Baseline Score x Time (5 year interval) | Baseline Score       | Time Trend (5 year interval) | Baseline Score x Time (5 year interval) | Baseline Score       | Time Trend (5 year interval) | Baseline Score x Time (5 year interval) |
| Neighborhood Social Environment | 0.82<br>(0.76, 0.89) | 0.71<br>(0.68, 0.75)         | 0.99<br>(0.94, 1.03)                    | 0.85<br>(0.76, 0.95) | 0.73<br>(0.69, 0.77)         | 0.98<br>(0.94, 1.03)                    | 0.89<br>(0.78, 1.00) | 0.74<br>(0.69, 0.79)         | 0.97<br>(0.92, 1.02)                    |
| Aesthetic Quality               | 0.84<br>(0.78, 0.91) | 0.72<br>(0.68, 0.75)         | 1.00<br>(0.95, 1.04)                    | 0.84<br>(0.74, 0.94) | 0.73<br>(0.69, 0.77)         | 0.99<br>(0.94, 1.04)                    | 0.87<br>(0.77, 0.99) | 0.73<br>(0.69, 0.77)         | 0.97<br>(0.92, 1.02)                    |
| Safety                          | 0.76<br>(0.70, 0.82) | 0.71<br>(0.68, 0.75)         | 0.98<br>(0.94, 1.04)                    | 0.84<br>(0.76, 0.93) | 0.73<br>(0.69, 0.77)         | 0.98<br>(0.93, 1.03)                    | 0.87<br>(0.78, 0.97) | 0.73<br>(0.69, 0.77)         | 0.97<br>(0.92, 1.03)                    |
| Social Cohesion                 | 0.90<br>(0.83, 0.98) | 0.71<br>(0.68, 0.75)         | 0.98<br>(0.93, 1.03)                    | 0.92<br>(0.82, 1.04) | 0.73<br>(0.69, 0.77)         | 0.98<br>(0.93, 1.03)                    | 0.98<br>(0.87, 1.11) | 0.73<br>(0.70, 0.77)         | 0.95<br>(0.90, 1.01)                    |

**B. Rate Ratio (95% CI) for Average Number of Cigarettes Smoker Per Day by Baseline Smokers N=714**

|                                 | Model 1              |                              |                                         | Model 2              |                              |                                         | Model 3              |                              |                                         |
|---------------------------------|----------------------|------------------------------|-----------------------------------------|----------------------|------------------------------|-----------------------------------------|----------------------|------------------------------|-----------------------------------------|
|                                 | Baseline Score       | Time Trend (5 year interval) | Baseline Score x Time (5 year interval) | Baseline Score       | Time Trend (5 year interval) | Baseline Score x Time (5 year interval) | Baseline Score       | Time Trend (5 year interval) | Baseline Score x Time (5 year interval) |
| Neighborhood Social Environment | 1.13<br>(1.03, 1.24) | 0.51<br>(0.47, 0.55)         | 0.97<br>(0.92, 1.03)                    | 1.00<br>(0.88, 1.13) | 0.44<br>(0.38, 0.50)         | 0.99<br>(0.93, 1.05)                    | 0.97<br>(0.84, 1.11) | 0.44<br>(0.38, 0.50)         | 0.99<br>(0.93, 1.06)                    |
| Aesthetic Quality               | 1.14<br>(1.04, 1.25) | 0.51<br>(0.47, 0.55)         | 0.99<br>(0.94, 1.04)                    | 1.00<br>(0.88, 1.14) | 0.44<br>(0.38, 0.50)         | 1.00<br>(0.94, 1.05)                    | 0.97<br>(0.84, 1.12) | 0.43<br>(0.38, 0.50)         | 1.00<br>(0.94, 1.07)                    |
| Safety                          | 1.12<br>(1.01, 1.23) | 0.51<br>(0.47, 0.55)         | 0.97<br>(0.91, 1.02)                    | 1.01<br>(0.90, 1.13) | 0.44<br>(0.38, 0.50)         | 0.99<br>(0.93, 1.05)                    | 0.99<br>(0.87, 1.12) | 0.44<br>(0.38, 0.50)         | 0.99<br>(0.93, 1.05)                    |
| Social Cohesion                 | 1.12<br>(1.02, 1.24) | 0.51<br>(0.47, 0.55)         | 0.97<br>(0.91, 1.03)                    | 0.98<br>(0.86, 1.12) | 0.44<br>(0.38, 0.50)         | 0.98<br>(0.93, 1.05)                    | 0.95<br>(0.83, 1.09) | 0.44<br>(0.38, 0.50)         | 0.99<br>(0.93, 1.05)                    |

<sup>a</sup> Results are from generalized linear mixed Poisson models with robust variance estimates. All models include the baseline neighborhood environment score, time in years since baseline, and an interaction between baseline neighborhood score and time since baseline to test whether neighborhood social environment modifies the change in smoking status over time. All models included repeated measures and a random intercept for each participant.

<sup>b</sup> Model 1 adjusted for baseline age and sex. Model 2 further adjusted for race, marital status, education, income, employment, alcohol use, baseline study site. Model 3 further adjusted for neighborhood socioeconomic status.

**Supplemental Table 5.** Sensitivity Analysis - Cross-sectional and Longitudinal Associations of Baseline Neighborhood Social Environment with Smoking Status and Intensity Among Participants with at least 3 Exam-Years of Data (N=5,526)

**A. Relative Risk (95% CI) for Current Smoking N=5,526**

|                                 | Model 1              |                              |                                         | Model 2              |                              |                                         | Model 3              |                              |                                         |
|---------------------------------|----------------------|------------------------------|-----------------------------------------|----------------------|------------------------------|-----------------------------------------|----------------------|------------------------------|-----------------------------------------|
|                                 | Baseline Score       | Time Trend (5 year interval) | Baseline Score x Time (5 year interval) | Baseline Score       | Time Trend (5 year interval) | Baseline Score x Time (5 year interval) | Baseline Score       | Time Trend (5 year interval) | Baseline Score x Time (5 year interval) |
| Neighborhood Social Environment | 0.82<br>(0.76, 0.89) | 0.73<br>(0.70, 0.77)         | 1.00<br>(0.96, 1.04)                    | 0.84<br>(0.75, 0.94) | 0.75<br>(0.71, 0.78)         | 1.00<br>(0.95, 1.04)                    | 0.87<br>(0.78, 0.99) | 0.75<br>(0.71, 0.79)         | 0.98<br>(0.93, 1.03)                    |
| Aesthetic Quality               | 0.84<br>(0.78, 0.91) | 0.73<br>(0.69, 0.78)         | 1.01<br>(0.97, 1.05)                    | 0.84<br>(0.75, 0.94) | 0.75<br>(0.71, 0.78)         | 1.00<br>(0.96, 1.04)                    | 0.87<br>(0.77, 0.99) | 0.75<br>(0.71, 0.79)         | 0.98<br>(0.94, 1.03)                    |
| Safety                          | 0.76<br>(0.70, 0.83) | 0.73<br>(0.69, 0.78)         | 1.01<br>(0.96, 1.05)                    | 0.84<br>(0.76, 0.93) | 0.75<br>(0.71, 0.79)         | 1.00<br>(0.96, 1.05)                    | 0.87<br>(0.78, 0.97) | 0.75<br>(0.71, 0.79)         | 0.99<br>(0.95, 1.04)                    |
| Social Cohesion                 | 0.90<br>(0.83, 0.98) | 0.73<br>(0.70, 0.77)         | 0.98<br>(0.94, 1.03)                    | 0.90<br>(0.81, 1.01) | 0.74<br>(0.71, 0.78)         | 0.98<br>(0.94, 1.03)                    | 0.95<br>(0.84, 1.07) | 0.75<br>(0.71, 0.79)         | 0.96<br>(0.91, 1.01)                    |

**B. Rate Ratio (95% CI) for Average Number of Cigarettes Smoked Per Day by Baseline Smokers N=692**

|                                 | Model 1              |                              |                                         | Model 2              |                              |                                         | Model 3              |                              |                                         |
|---------------------------------|----------------------|------------------------------|-----------------------------------------|----------------------|------------------------------|-----------------------------------------|----------------------|------------------------------|-----------------------------------------|
|                                 | Baseline Score       | Time Trend (5 year interval) | Baseline Score x Time (5 year interval) | Baseline Score       | Time Trend (5 year interval) | Baseline Score x Time (5 year interval) | Baseline Score       | Time Trend (5 year interval) | Baseline Score x Time (5 year interval) |
| Neighborhood Social Environment | 1.14<br>(1.03, 1.25) | 0.51<br>(0.47, 0.55)         | 0.97<br>(0.92, 1.03)                    | 1.02<br>(0.90, 1.15) | 0.44<br>(0.38, 0.49)         | 0.99<br>(0.93, 1.04)                    | 0.99<br>(0.87, 1.13) | 0.43<br>(0.38, 0.49)         | 0.99<br>(0.94, 1.05)                    |
| Aesthetic Quality               | 1.12<br>(1.02, 1.23) | 0.51<br>(0.48, 0.55)         | 0.99<br>(0.94, 1.04)                    | 1.00<br>(0.88, 1.14) | 0.43<br>(0.38, 0.49)         | 1.00<br>(0.95, 1.05)                    | 0.97<br>(0.85, 1.11) | 0.43<br>(0.38, 0.49)         | 1.00<br>(0.95, 1.06)                    |
| Safety                          | 1.13<br>(1.02, 1.24) | 0.51<br>(0.47, 0.55)         | 0.97<br>(0.92, 1.03)                    | 1.04<br>(0.92, 1.16) | 0.43<br>(0.38, 0.49)         | 0.99<br>(0.93, 1.05)                    | 1.01<br>(0.90, 1.15) | 0.43<br>(0.38, 0.49)         | 0.99<br>(0.93, 1.05)                    |
| Social Cohesion                 | 1.13<br>(1.02, 1.25) | 0.51<br>(0.47, 0.55)         | 0.96<br>(0.91, 1.02)                    | 1.01<br>(0.89, 1.15) | 0.44<br>(0.38, 0.50)         | 0.98<br>(0.92, 1.03)                    | 0.99<br>(0.87, 1.13) | 0.44<br>(0.38, 0.50)         | 0.98<br>(0.92, 1.04)                    |

<sup>a</sup> Results are from generalized linear mixed Poisson models with robust variance estimates. All models include the baseline neighborhood environment score, time in years since baseline, and an interaction between baseline neighborhood score and time since baseline to test whether neighborhood social environment modifies the change in smoking status over time. All models included repeated measures and a random intercept for each participant.

<sup>b</sup> Model 1 adjusted for baseline age and sex. Model 2 further adjusted for race, marital status, education, income, employment, alcohol use, baseline study site. Model 3 further adjusted for neighborhood socioeconomic status.
